# Supplementary material for: Race/Ethnicity and the Pharmacogenetics of Reported Suicidality With Efavirenz Among Clinical Trials Participants
Source: PubMed Central journal article supplement (PMC5853681; doi:10.1093/infdis/jix248), 2017-07-06

**Supplemental Table: Definition of CYP2B6 and CYP2B6/CYP2A6 efavirenz metabolism genotype levels.** CYP2B6 indicates combinations of 10- or 12-level metabolism genotype levels into 3-level metabolism genotype levels.

| CYP2B6_met | rs28399433 | rs4803419 | rs3745274 | rs28399499 | CYP2B6    | EFV_level |
|------------|------------|-----------|-----------|------------|-----------|-----------|
| 1          | -          | CC        | GG        | TT         | Extensive | lowest    |
| 2          | -          | CT        | GG        | TT         | Extensive |           |
| 3          | -          | TT        | GG        | TT         | Mid       |           |
| 4          | -          | CC        | GT        | TT         | Mid       |           |
| 5          | -          | CC        | GG        | CT         | Mid       |           |
| 6          | -          | CT        | GT        | TT         | Mid       |           |
| 7          | -          | CT        | GG        | CT         | Mid       |           |
| 8          | -          | CC or CT  | TT        | TT         | Slow      |           |
| 9          | -          | CC        | GT        | CT         | Slow      |           |
| 10         | -          | CC        | GG        | CC         | Slow      | highest   |

| CYP2A6_hi | rs28399433 | rs4803419 | rs3745274 | rs28399499 | CYP2A6    | EFV_level |
|-----------|------------|-----------|-----------|------------|-----------|-----------|
| 1         | -          | CC        | GG        | TT         | Extensive | lowest    |
| 2         | -          | CT        | GG        | TT         | Extensive |           |
| 3         | -          | TT        | GG        | TT         | Mid       |           |
| 4         | -          | CC        | GT        | TT         | Mid       |           |
| 5         | -          | CC        | GG        | CT         | Mid       |           |
| 6         | -          | CT        | GT        | TT         | Mid       |           |
| 7         | -          | CT        | GG        | CT         | Mid       |           |
| 8         | -          | CC or CT  | TT        | TT         | Slow      |           |
| 9         | -          | CC        | GT        | CT         | Slow      |           |
| 10        | -          | CC        | GG        | CC         | Slow      |           |
| 11        | GT         | CC        | TT        | TT         | Slow      |           |
| 11        | GT         | CC        | GT        | CT         | Slow      |           |
| 11        | GT         | CC        | GG        | CC         | Slow      |           |
| 12        | GG         | CC or CT  | TT        | TT         | Slow      |           |
| 12        | GG         | CC        | GT        | CT         | Slow      |           |
| 12        | GG         | CC        | GG        | CC         | Slow      | highest   |

**Supplemental Figure 1. Cumulative probability of suicidality for each metabolizer group among participants who were randomly assigned to efavirenz-containing regimens, and in the efavirenz-free group regardless of metabolizer group, overall and by race/ethnicity.**

*Panel A:* Estimated cumulative probability of suicidality for each metabolizer group overall among all participants. *Panel B:* Cumulative probability of suicidality for each metabolizer group among White participants. *Panel C:* Cumulative probability of suicidality for each metabolizer group among Black participants. *Panel D:* Cumulative probability of suicidality for each metabolizer group among Hispanic participants. One minus the Kaplan-Meier estimate is shown. The number at risk is shown below each panel and the number of suicidality events is provided in the legend.

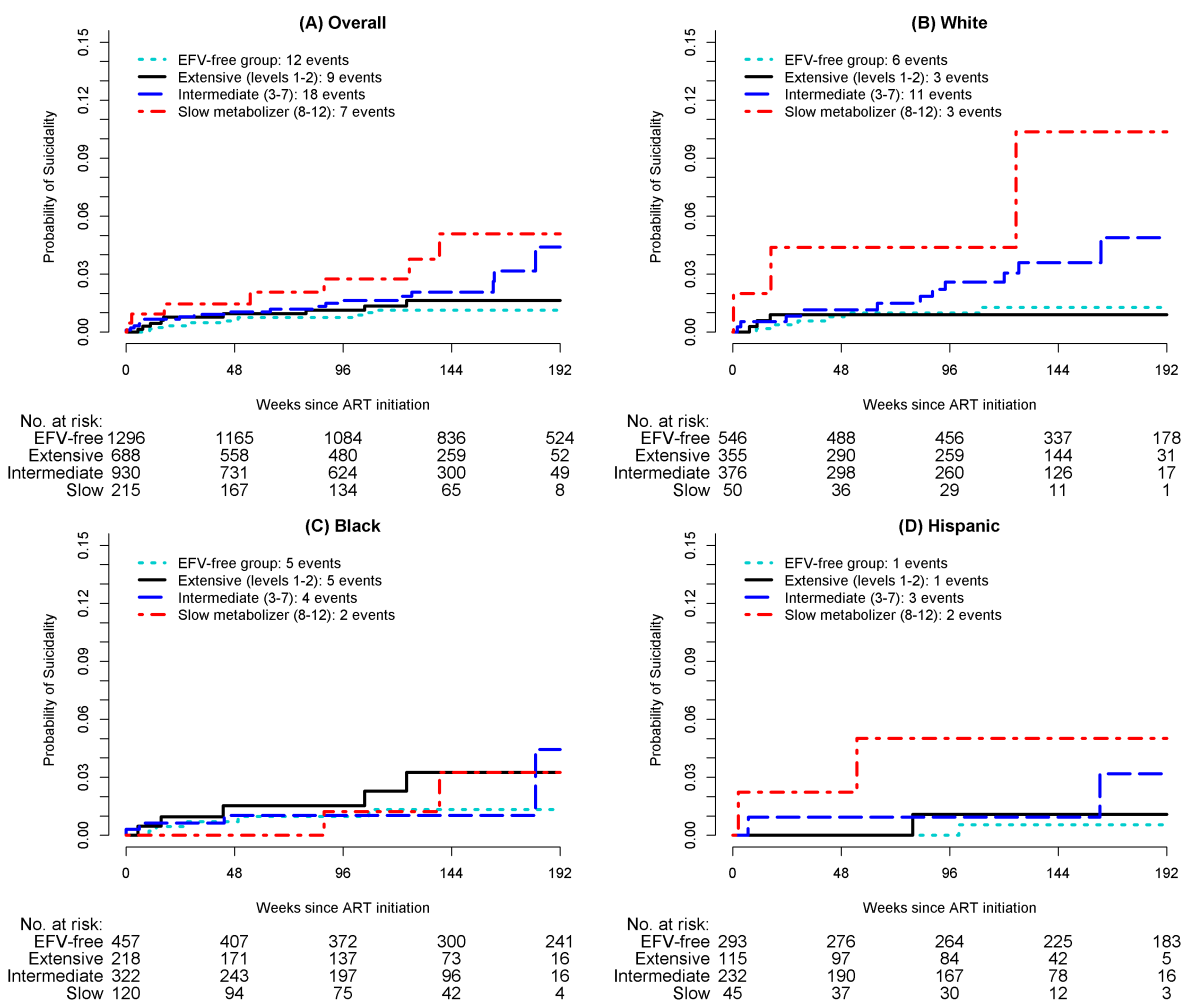

Supplement: jix248_suppl_supplementary_material.pdf [file jix248_suppl_supplementary_material.pdf]
